# 1 The protective effect of sickle cell haemoglobin against severe 2 malaria depends on parasite genotype

3 Gavin Band<sup>1,2</sup>, Ellen M. Leffler<sup>2,3</sup>, Muminatou Jallow<sup>4</sup>, Fatoumatta Sisay-Joof<sup>4</sup>,  
4 Carolyne M. Ndila<sup>5</sup>, Alexander W. Macharia<sup>5</sup>, Christina Hubbard<sup>1</sup>, Anna E. Jeffreys<sup>1</sup>,  
5 Kate Rowlands<sup>1</sup>, Thuy Nguyen<sup>2</sup>, Sonia M. Goncalves<sup>2</sup>, Cristina V. Ariani<sup>2</sup>, Jim  
6 Stalker<sup>2</sup>, Richard D. Pearson<sup>1,2</sup>, Roberto Amato<sup>2</sup>, Eleanor Drury<sup>2</sup>, Giorgio Sirugo<sup>4</sup>,  
7 Umberto D'Alessandro<sup>4</sup>, Kalifa A. Bojang<sup>4</sup>, Kevin Marsh<sup>5,6</sup>, Norbert Peshu<sup>5</sup>, David J.  
8 Conway<sup>4,7</sup>, Thomas N. Williams<sup>5,8</sup>, Kirk A. Rockett<sup>1,2</sup>, Dominic P. Kwiatkowski<sup>1,2,8</sup>

9  
10 <sup>1</sup> Wellcome Centre for Human Genetics, University of Oxford, Oxford, UK.

11 <sup>2</sup> Wellcome Sanger Institute, Hinxton, Cambridge, UK.

12 <sup>3</sup> Department of Human Genetics, University of Utah, Salt Lake City, Utah 84112-5330.

13 <sup>4</sup> Medical Research Council Unit The Gambia at the London School of Hygiene and Tropical Medicine, Atlantic Boulevard,  
14 Fajara, The Gambia.

15 <sup>5</sup> KEMRI-Wellcome Trust Research Programme, CGMRC, PO Box 230-80108, Kenya

16 <sup>6</sup> Centre for Global Health Tropical Medicine, University of Oxford, Oxford, UK.

17 <sup>7</sup> London School of Hygiene and Tropical Medicine, Keppel Street, London, UK.

18 <sup>8</sup> Department of Infectious Diseases, Imperial College Faculty of Medicine, London W21NY, United Kingdom

19 <sup>9</sup> MRC Centre for Genomics and Global Health, Big Data Institute, Old Road Campus, Oxford OX3 7LF, UK

## 20 Abstract

21  
22 Host genetic factors can confer resistance against malaria, raising the question of  
23 whether this has led to evolutionary adaptation of parasite populations. In this study  
24 we investigated the correlation between host and parasite genetic variation in 4,171  
25 Gambian and Kenya children ascertained with severe malaria due to *Plasmodium*  
26 *falciparum*. We identified a strong association between sickle haemoglobin (HbS) in  
27 the host and variation in three regions of the parasite genome, including  
28 nonsynonymous variants in the acyl-CoA synthetase family member *PfACS8* on  
29 chromosome 2, in a second region of chromosome 2, and in a region containing  
30 structural variation on chromosome 11. The HbS-associated parasite alleles are in  
31 strong linkage disequilibrium and have frequencies which covary with the frequency  
32 of HbS across populations, in particular being much more common in Africa than  
33 other parts of the world. The estimated protective effect of HbS against severe  
34 malaria, as determined by comparison of cases with population controls, varies  
35 greatly according to the parasite genotype at these three loci. These findings open up  
36 a new avenue of enquiry into the biological and epidemiological significance of the  
37 HbS-associated polymorphisms in the parasite genome, and the evolutionary forces  
38 that have led to their high frequency and strong linkage disequilibrium in African *P.*  
39 *falciparum* populations.

## 40 **Main text**

41 Malaria can be viewed as an evolutionary arms race between the host and parasite  
42 populations. Human populations in Africa have acquired a high frequency of sickle  
43 haemoglobin (HbS) and other erythrocyte polymorphisms that provide protection  
44 against the severe symptoms of *Plasmodium falciparum*<sup>1,2</sup> infection, while *P.*  
45 *falciparum* populations have evolved a complex repertoire of genetic variation to  
46 evade the human immune system and to resist antimalarial drugs<sup>3,4</sup>. This raises the  
47 basic question: are there genetic forms of *P. falciparum* that can overcome the human  
48 variants that confer resistance to this parasite?

49  
50 To address this question, we analysed both host and parasite genome variation in  
51 samples from 5,096 Gambian and Kenyan children with severe malaria due to *P.*  
52 *falciparum* (**Supplementary Figure 1-2** and **Methods**). All of the samples were  
53 collected over the period 1995-2009 as part of a genome-wide association study  
54 (GWAS) of human resistance to severe malaria that has been reported elsewhere<sup>2,5,6</sup>.  
55 In brief, we sequenced the *P. falciparum* genome using the Illumina X Ten platform  
56 using two approaches based on sequencing whole DNA and selective whole genome  
57 amplification<sup>7</sup>. We used an established pipeline<sup>8</sup> to identify and call genotypes at  
58 over 2 million single nucleotide polymorphisms (SNPs) and short insertion/deletion  
59 variants across the Pf genome in these samples (**Methods**). The following analysis is  
60 based on 4,171 samples that had high quality data for both parasite and human  
61 genotypes and were not closely related, of which a subset of 3,346 had human  
62 genome-wide genotyping available. We focussed on a set of 51,225 biallelic variants  
63 in the *P.falciparum* genome that passed all quality control filters and were observed in  
64 at least 25 infections in this subset. Our analyses exclude mixed genotype calls that  
65 arise in malaria when a host is infected with multiple parasite lineages. Full details of  
66 our sequencing and data processing can be found in **Supplementary Methods**.

67  
68 We used a logistic regression approach to test for pairwise association between these  
69 *P. falciparum* variants and human variants selected according to four criteria: i.  
70 known autosomal protective mutations, including HbS (within *HBB*), the common  
71 mutation that determines O blood group (within *ABO*), regulatory variation associated  
72 with protection at *ATP2B4*<sup>2,5,9</sup> and the structural variant DUP4, which encodes the

73 Dantu blood group phenotype<sup>10</sup>; ii. variants that showed suggestive but not  
74 conclusive evidence of association with severe malaria in our previous GWAS<sup>5</sup>; iii.  
75 HLA alleles and additional glycoporphin structural variants that we previously imputed  
76 in these samples; and iv. variants near genes that encode human blood group antigens,  
77 which we tested against the subset of *P.falciparum* variants lying near genes which  
78 encode proteins important for the merozoite stage<sup>11,12</sup>, as these might conceivably  
79 interact during host cell invasion by the parasite. Although several factors could  
80 confound this analysis in principle – notably, if there were incidental association  
81 between human and parasite population structure – the distribution of test statistics  
82 suggested that our test was not affected by systematic confounding after including  
83 only an indicator of country as a covariate (**Supplementary Figure 3**), and we used  
84 this approach for our main analysis. A full list of results is summarised in  
85 **Supplementary Figure 4 and Supplementary Table 1**.

86

87 The most striking finding to arise from this joint analysis of host and parasite  
88 variation was a strong association between the sickle haemoglobin allele HbS and  
89 three separate regions in the *P. falciparum* genome (**Supplementary Figure 4 and**  
90 **Figure 1**). Additional associations with marginal levels of evidence were observed at  
91 a number of other loci, including a potential association between *GCNT1* in the host  
92 and *PfMSP4* in the parasite and associations involving HLA alleles (detailed in  
93 **Supplementary Methods and Supplementary Table 1**), but here we focus on the  
94 association with HbS.

95

96 The statistical evidence for association at the HbS-associated loci can be described as  
97 follows, focussing on the variant with the strongest association in each region and  
98 assuming an additive model of effect of the host allele on parasite genotype  
99 (**Supplementary Table 1**). The chr2: 631,190 T>A variant, which lies in *PfACS8*,  
100 was associated with HbS with Bayes factor ( $BF_{HbS}$ ) =  $1.1 \times 10^{15}$  (computed under a  
101 log-F(2,2) prior; **Methods**) and  $P = 4.8 \times 10^{-13}$  (computed using a Wald test;  
102 **Supplementary Methods**). At a second region on chromosome 2, the chr2: 814,288  
103 C>T variant, which lies in *Pf3D7\_0220300*, was associated with  $BF_{HbS} = 2.4 \times 10^9$   
104 and  $P = 1.6 \times 10^{-10}$ . At the chromosome 11 locus, the chr11: 1,058,035 T>A variant,  
105 which lies in *Pf3D7\_1127000*, was associated with  $BF_{HbS} = 1.5 \times 10^{17}$  and  $P = 7.3 \times 10^{-$   
106 <sup>12</sup>. For brevity we shall refer to these HbS-associated loci as *Pfsa1*, *Pfsa2* and *Pfsa3*

107 respectively, and we shall use + and – signs to refer to the alleles that are positively  
 108 and negatively correlated with HbS, e.g. *Pfsa1*+ is the allele that is positively  
 109 correlated with HbS at the *Pfsa1* locus. All three of the lead variants are  
 110 nonsynonymous mutations of their respective genes, as are additional associated  
 111 variants in these regions (**Figure 1** and **Supplementary Table 1**).

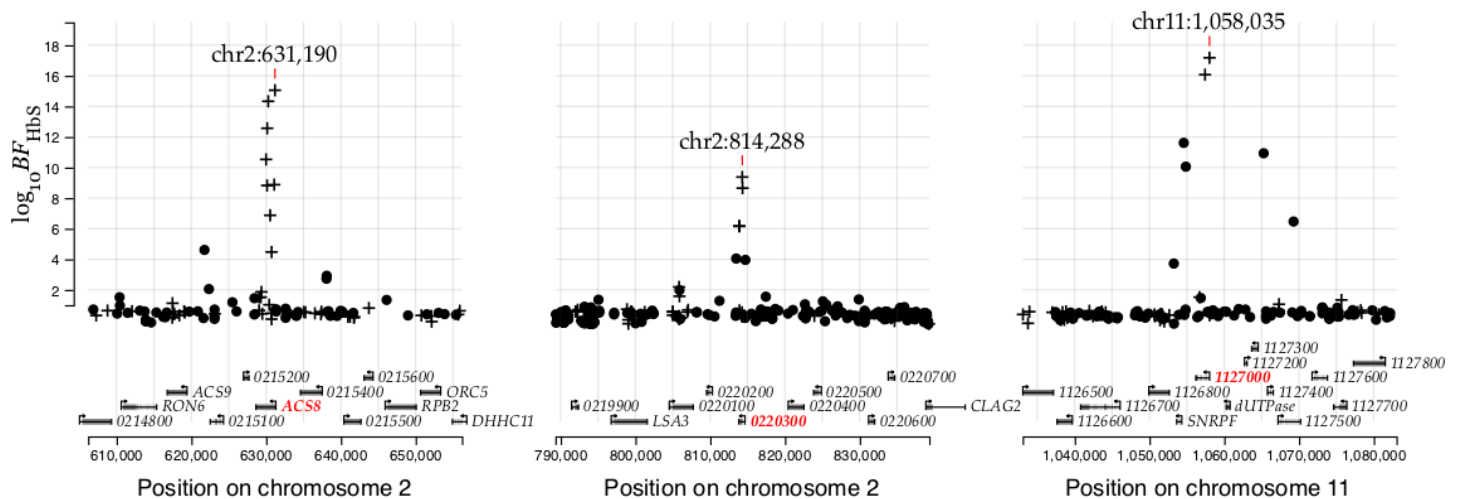

112 **Figure 1: Evidence for association with HbS in three regions of the *Pf* genome.** Points show  
 113 evidence for association with HbS ( $\log_{10}$  Bayes Factor for test in  $N=3,346$  samples, y axis) for  
 114 variants in the *Pfsa1*, *Pfsa2* and *Pfsa3* regions of the *Pf* genome (panels). Variants which alter  
 115 protein coding sequence are denoted by plusses, while other variants are denoted by circles.  
 116 Results are computed by logistic regression including an indicator of country as a covariate and  
 117 assuming an additive model of association, with HbS genotypes based on imputation from  
 118 genome-wide genotypes as previously described<sup>5</sup>; mixed and missing *Pf* genotype calls were  
 119 excluded from the computation. A corresponding plot using directly-typed HbS genotypes can be  
 120 found in **Supplementary Figure 5**. The variant with the strongest association in each region is  
 121 annotated and the panels show regions of length 50kb centred at this variant. Below, regional  
 122 genes are annotated, with gene symbols given where the gene has an ascribed name in the  
 123 PlasmoDB annotation (after removing 'PF3D7\_' from the name where relevant); the three genes  
 124 containing the most-associated variants are shown in red.

125

126 We attempted to replicate this finding in a separate set of 825 samples in which the  
 127 HbS genotypes have previously been assayed<sup>2</sup> (**Supplementary Table 2**). The *Pfsa3*  
 128 association replicated at nominal levels of evidence in the smaller Gambian sample  
 129 (one-tailed  $P = 0.026$ ), and all three loci replicated convincingly in the larger set of  
 130 samples from Kenya ( $P < 0.001$ ). Across the full dataset of 4,071 samples there is  
 131 thus very strong evidence of association with HbS at all three loci ( $BF_{HbS} = 4.7 \times 10^{20}$   
 132 for *Pfsa1*,  $3.3 \times 10^{12}$  for *Pfsa2*, and  $2.5 \times 10^{24}$  for *Pfsa3*; **Supplementary Figure 5**) with  
 133 corresponding large effect size estimates (estimated odds ratio (OR) = 11.8 for  
 134 *Pfsa1*+, 7.4 for *Pfsa2*+ and 21.7 for *Pfsa3*+). As described above, these estimates  
 135 assume an additive relationship between HbS and the *Pf* genotype at each locus, but

136 we also noted that genotype counts are most consistent with an overdominance effect  
 137 (**Supplementary Figure 6**). We further examined the effect of adjusting for  
 138 covariates including human and parasite principal components reflecting population  
 139 structure, year of sampling, clinical type of severe malaria and technical features  
 140 related to sequencing (**Supplementary Figure 7**). Inclusion of these covariates did  
 141 not substantially affect results with one exception: we found that parasite principal  
 142 components (PCs) computed across the whole *P.falciparum* genome in Kenya  
 143 included components that correlated with the *Pfsa* loci, and including these PCs  
 144 reduced the association signal. Altering the PCs by removing the *Pfsa* regions  
 145 restored the association, indicating that this is not due to a general population  
 146 structure effect that is reflected in genotypes across the *P.falciparum* genome, and we  
 147 further discuss the reasons for this finding below. Taken together, these data appear to  
 148 indicate genuine differences in the distribution of parasite genotypes between severe  
 149 infections of HbS- and non-HbS genotype individuals.

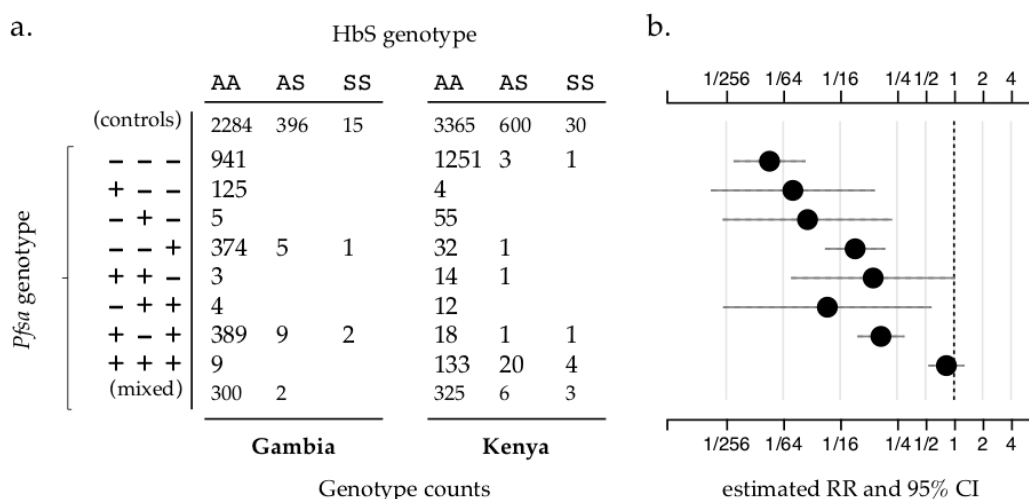

150 **Figure 2: The estimated relative risk for HbS varies by *Pfsa* genotype.** Panel a) shows the  
 151 count of severe malaria cases from The Gambia and Kenya with given HbS genotype (columns;  
 152 using  $N = 4,071$  samples with directly-typed HbS genotype) and carrying the given alleles at the  
 153 *Pfsa1*, 2, and 3 loci (rows). *Pfsa* alleles are indicated by + for the allele positively associated with  
 154 HbS and - for the negatively associated allele at each locus. Samples with mixed *P.falciparum*  
 155 genotype calls for at least one of the loci are shown in the last row and further detailed in  
 156 **Supplementary Figure 8**. The first row indicates counts of HbS genotypes in population control  
 157 samples from the same populations<sup>5</sup>. Panel b) shows the estimated relative risk of HbS on severe  
 158 malaria with the given *Pfsa* genotypes (rows) using the data in panel a. Relative risks were  
 159 estimated using a multinomial logistic regression model with controls as the baseline outcome and  
 160 assuming complete dominance (i.e. that HbAS and HbSS genotypes have the same association  
 161 with parasite genotype) as described in **Supplementary Methods**. An indicator of country was  
 162 included as a covariate. To reduce overfitting we used Stan<sup>13</sup> to fit the model assuming a mild  
 163 regularising Gaussian prior with mean zero and standard deviation of 2 on the log-odds scale (i.e.  
 164 with 95% of mass between 1/50 and 50 on the relative risk scale) for each parameter, and between-  
 165 parameter correlations set to 0.5. Solid horizontal lines denote the corresponding 95% credible  
 166 intervals.

167 The level of protection afforded by HbS can be estimated by comparing its frequency  
 168 between severe malaria cases and population controls. As shown in **Figure 2**, the vast  
 169 majority of children with HbS genotype in our data were infected with parasites that  
 170 carry *Pfsa+* alleles. Corresponding to this, our data show little evidence of a  
 171 protective effect of HbS against severe malaria with parasites of *Pfsa1+*, *Pfsa2+*,  
 172 *Pfsa3+* genotype (estimated relative risk (*RR*) = 0.83, 95% CI = 0.53-1.30). In  
 173 contrast, HbS is strongly associated with reduced risk of disease caused by parasites  
 174 of *Pfsa1-*, *Pfsa2-*, *Pfsa3-* genotype (*RR* = 0.01, 95% CI = 0.007-0.03). These  
 175 estimates should be interpreted with caution because they are based on just 49 cases  
 176 of severe malaria that had an HbS genotype, because many of these samples were  
 177 included in the initial discovery dataset, and because there is some variation evident  
 178 between populations; however it can be concluded that the protective effect of HbS is  
 179 dependent on parasite genotype at the *Pfsa* loci.

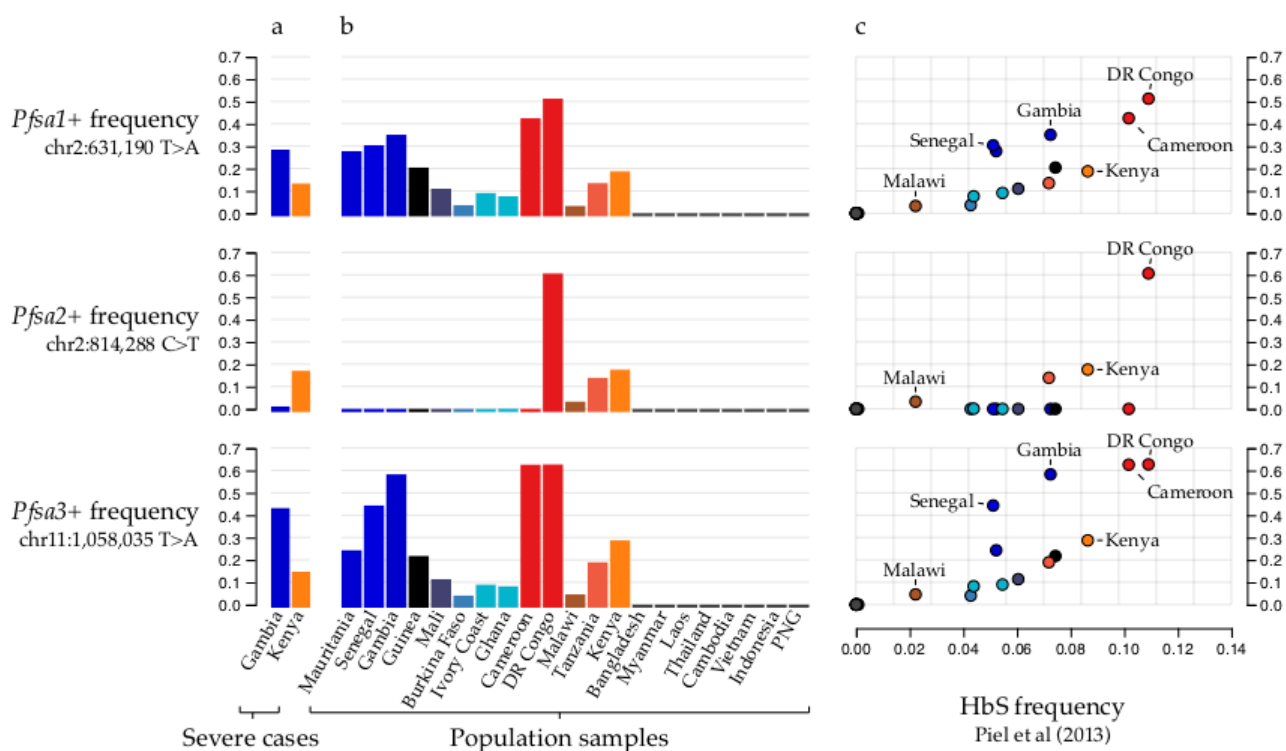

180 **Figure 3: The relationship between *Pfsa* and HbS allele frequencies across populations. a)**  
 181 **bars show the estimated frequency (y axis) of each *Pfsa+* allele (rows) in severe malaria cases**  
 182 **from each country (x axis and colours). Details of allele frequencies and sample counts across**  
 183 **years of ascertainment can be found in **Supplementary Figure 9**. b) bars show the estimated**  
 184 **frequency (y axis, as in panel a) of each *Pfsa+* allele in worldwide populations from the**  
 185 **MalariaGEN Pf6 resource, which contains samples collected in the period 2008-2015<sup>8</sup>. Only**  
 186 **countries with at least 50 samples are shown (this excludes Columbia, Peru, Benin, Nigeria,**  
 187 **Ethiopia, Madagascar, Uganda, and Bangladesh). c) Points show *Pfsa+* allele frequency (y axis,**  
 188 **as in panel a and b) against HbS allele frequency (x axis) in populations from MalariaGEN Pf6**  
 189 **(coloured as in panel b; selected populations are also labelled). HbS allele frequencies are**  
 190 **computed from frequency estimates previously published by the Malaria Atlas Project<sup>14</sup> by taking**

191 a weighted average over sampling sites within each country in MalariaGEN Pf6. All *Pfsa* allele  
192 frequencies were estimated after excluding mixed or missing genotype calls.

193

194 The *Pfsa1+*, *Pfsa2+* and *Pfsa3+* alleles had similar frequencies in Kenya  
195 (approximately 10-20%) whereas in Gambia *Pfsa2+* had a much lower allele  
196 frequency than *Pfsa1+* or *Pfsa3+* (< 3% in all years studied, versus 25-60% for the  
197 *Pfsa1+* or *Pfsa3+* alleles; **Figure 3a and Supplementary Figure 9**). To explore the  
198 population genetic features of these loci in more detail, we analysed the MalariaGEN  
199 Pf6 open resource which gives *P. falciparum* genome variation data for 7,000  
200 worldwide samples <sup>8</sup> (**Figure 3b**). This showed considerable variation in the  
201 frequency of these alleles across Africa, the maximum observed value being 61% for  
202 *Pfsa3+* in the Democratic Republic of Congo, and indicated that these alleles are rare  
203 outside Africa. Moreover, we found that within Africa, population frequencies of the  
204 *Pfsa+* alleles are strongly correlated with the frequency of HbS (**Figure 3c**, estimated  
205 using data from the Malaria Atlas Project <sup>14</sup>).

206

207 This analysis also revealed a further feature of the *Pfsa+* alleles: although *Pfsa1* and  
208 *Pfsa2* are separated by 180kb, and the *Pfsa3* locus is on a different chromosome, they  
209 are in strong linkage disequilibrium (LD). This can be seen from the co-occurrence of  
210 these alleles in severe cases (**Figure 2**), and from the fact that they covary over time  
211 in our sample (**Supplementary Figure 9**) and geographically across populations  
212 (**Figure 3b**). To investigate this we computed LD metrics between the *Pfsa+* alleles  
213 in each population (**Supplementary Table 3**) after excluding HbS-carrying  
214 individuals to avoid confounding with the association outlined above. *Pfsa1+* and  
215 *Pfsa2+* were strongly correlated in Kenyan severe cases ( $r = 0.75$ ) and *Pfsa1+* and  
216 *Pfsa3+* were strongly correlated in both populations ( $r = 0.80$  in Kenya;  $r = 0.43$  in  
217 severe cases from The Gambia). This high LD was also observed in multiple  
218 populations in MalariaGEN Pf6 (e.g.  $r = 0.20$  between *Pfsa1+* and *Pfsa3+* in The  
219 Gambia;  $r = 0.71$  in Kenya;  $r > 0.5$  in all other African populations surveyed;  
220 **Supplementary Table 3**), showing that the LD is not purely an artifact of our severe  
221 malaria sample.

222

223 This observation of strong correlation between alleles at distant loci is unexpected,  
224 because the *P. falciparum* genome undergoes recombination in the mosquito vector  
225 and typically shows very low levels of LD in malaria endemic regions <sup>15-17</sup>. To

226 confirm that this is unusual, we compared LD between the *Pf*sa loci to the distribution  
227 computed from all common biallelic variants on different chromosomes (**Figure 4**  
228 and **Table 1**). In Kenyan samples, the *Pf*sa loci have the highest between-  
229 chromosome LD of any pair of variants in the genome. In Gambia, between-  
230 chromosome LD at these SNPs is also extreme, but another pair of extensive regions  
231 on chromosomes 6 and 7 also show strong LD (**Table 1**). These regions contain the  
232 chloroquine resistance-linked genes *pfCRT* and *pfAAT1*<sup>18,19</sup> and contain long  
233 stretches of DNA sharing identical by descent (IBD) consistent with positive selection  
234 of antimalarial-resistant haplotypes<sup>20</sup>. Moreover, we noted that these signals are  
235 among a larger set of HbS-associated and drug-resistance loci that appear to have  
236 elevated between-chromosome LD in these data (**Supplementary Table 4**).

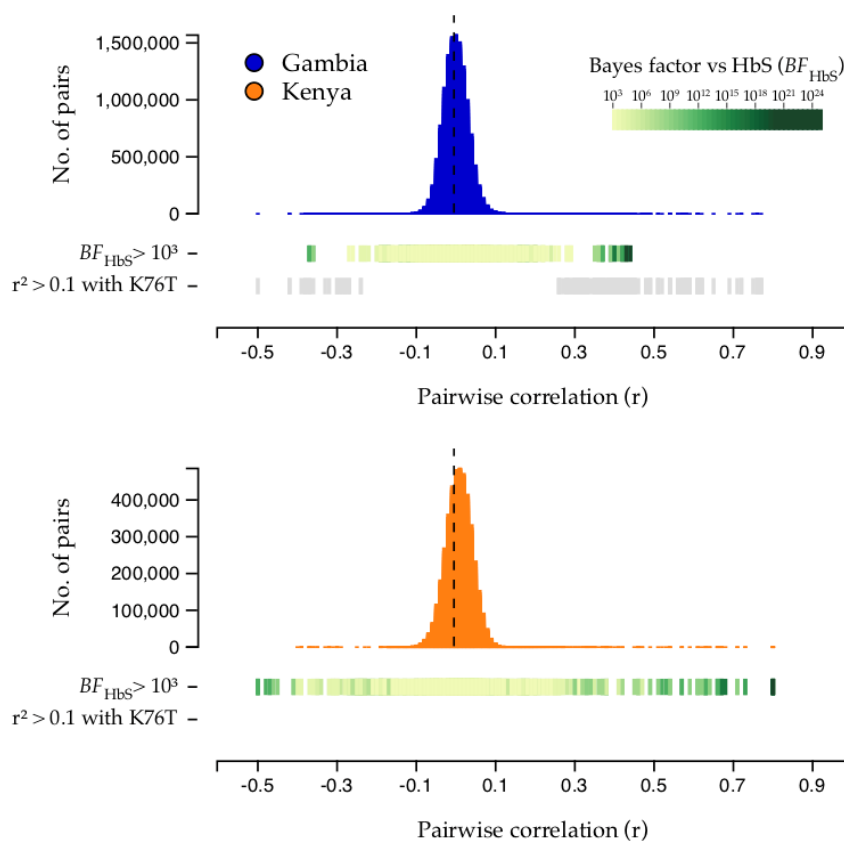

237  
238 **Figure 4: HbS-associated variants show extreme between-chromosome correlation in severe**  
239 ***P. falciparum* infections.** Histograms show the distribution of genotype correlation (r) between  
240 variants on different *Pf* chromosomes in The Gambia (top panel; blue) and Kenya (bottom panel;  
241 orange). To avoid capturing effects of the HbS association, correlation values are computed after  
242 excluding HbS-carrying individuals. Correlation for each pair of variants is computed after  
243 excluding samples with mixed genotype calls, across all biallelic variants with estimated minor  
244 allele frequency at least 5% and at least 75% of samples having non-missing and non-mixed  
245 genotype call. Coloured bars indicate the evidence for association with HbS ( $BF_{HbS}$ ) for variants  
246 in each comparison (shown for variants with  $BF_{HbS} > 1,000$ ; colour reflects the minimum  $BF_{HbS}$   
247 across the two variants in the pair as shown in the legend). Grey bars indicate variants with  $r^2$   
248  $> 0.1$  with the *PfCRT* K76T mutation; as shown, no such variants were observed in Kenya.



| Country | First region                    |                            |                                   |                  |                      | Second region                    |                             |                           |                  |                      | Linkage disequilibrium |      |
|---------|---------------------------------|----------------------------|-----------------------------------|------------------|----------------------|----------------------------------|-----------------------------|---------------------------|------------------|----------------------|------------------------|------|
|         | Region boundaries               | Lead variant               | Region / Gene                     | Allele frequency | $BF_{HbS}$           | Region boundaries                | Lead variant                | Region / Gene             | Allele frequency | $BF_{HbS}$           | N                      | R    |
| Gambia  | chr6<br>1,174,040-<br>1,293,328 | chr6<br>1,215,233<br>G > A | <i>PfAATI</i>                     | 80%              | 4.7                  | chr7<br>361,356-<br>481,853      | chr7<br>403,618<br>A > AT   | <i>PfCRT</i>              | 74%              | 68                   | 1,967                  | 0.77 |
| Gambia  | chr2<br>621,756-<br>640,163     | chr2<br>631,092<br>T > C   | <i>Pfsa1</i><br>( <i>PfACS8</i> ) | 28%              | $5.8 \times 10^{12}$ | chr11<br>1,053,258-<br>1,065,275 | chr11<br>1,057,437<br>T > C | <i>Pfsa3</i><br>(1127000) | 46%              | $8.7 \times 10^{21}$ | 1,881                  | 0.44 |
| Kenya   | chr2<br>621,756-<br>631,190     | chr2<br>629,996<br>C > A   | <i>Pfsa1</i><br>( <i>PfACS8</i> ) | 12%              | $2.4 \times 10^{15}$ | chr11<br>1,053,258-<br>1,069,278 | chr11<br>1,058,035<br>T > A | <i>Pfsa3</i><br>(1127000) | 13%              | $2.5 \times 10^{24}$ | 1,625                  | 0.81 |
| Kenya   | chr2<br>805,840-<br>825,357     | chr2<br>814,329<br>A > G   | <i>Pfsa2</i><br>(0220300)         | 16%              | $2.2 \times 10^{12}$ | chr11<br>1,053,258-<br>1,065,275 | chr11<br>1,057,437<br>T > C | <i>Pfsa3</i><br>(1127000) | 14%              | $8.7 \times 10^{21}$ | 1,557                  | 0.67 |

**Table 1: Regions of highest correlation between *P.falciparum* chromosomes.** Table shows all pairs of regions on different chromosomes containing pairs of SNPs with allele frequency at least 5% and squared correlation  $> 0.25$  in each population. Region boundaries are defined to include all nearby pairs of correlated variants in either population with minor allele frequency  $\geq 5\%$  and  $r^2 > 0.05$ , such that no other such pair of variants within 10kb of the given region boundaries is present. For each region in the pair, columns show the region boundaries, the lead variant, the region and/or gene containing the lead variant, the allele frequency, and the BF for association with HbS across populations. The rightmost columns give the sample size for the pairwise comparison after treating mixed genotype calls as missing, and the computed correlation. A longer list of regions showing between-chromosome LD can be found in **Supplementary Table 4**.

249 Taking together these new findings with other population genetic evidence from  
250 multiple locations across Africa, including observations of frequency differentiation  
251 within and across *P.falciparum* populations<sup>17,21,22</sup> and other metrics at these loci  
252 indicative of selection<sup>20,23,24</sup>, it appears likely that the allele frequencies and strong  
253 linkage disequilibrium between *Pfsa1*, *Pfsa2* and *Pfsa3* are maintained by natural  
254 selection. However, the mechanism for this is unclear. Given our findings, an  
255 obvious hypothesis is that the *Pfsa1+*, *Pfsa2+* and *Pfsa3+* alleles are positively  
256 selected in hosts with HbS, but since the frequency of HbS carriers is typically <20%  
257<sup>2,14</sup> it is not clear whether this alone is a sufficient explanation to account for the high  
258 population frequencies or the strong LD observed in non-HbS carriers. Thus it  
259 remains entirely possible that there are other selective factors involved, such as  
260 epistatic interactions between these loci, or effects on fitness in the host or vector in  
261 addition to those observed here in relation to HbS.

262

263 The biological function of these parasite loci is a matter of considerable interest for  
264 future investigation. At the *Pfsa1* locus, the signal of association includes non-  
265 synonymous changes in the *PfACS8* gene, which encodes an acyl-CoA-synthetase<sup>25</sup>.  
266 It belongs to a gene family that has expanded in the *Laverania* relative to other  
267 *Plasmodium* species<sup>26</sup>, and lies close to a paralog *PfACS9* on chromosome 2. The  
268 function of genes at the *Pfsa2* and *Pfsa3* loci are less well characterized. We analysed  
269 available genome assemblies of *P. falciparum* isolates<sup>27</sup> and found evidence that  
270 *Pfsa3+* is linked to a neighbouring copy number variant that includes duplication of  
271 the small nuclear ribonucleoprotein *SNRPF* (**Supplementary Figure 10**).

272 Understanding the functional role of these loci could provide important clues into  
273 how HbS protects against malaria and help to distinguish between the various  
274 proposed mechanisms including: enhanced macrophage clearance of infected  
275 erythrocytes<sup>28</sup>, inhibition of intraerythrocytic growth dependent on oxygen levels<sup>29</sup>,  
276 altered cytoadherence of infected erythrocytes<sup>30</sup> due to cytoskeleton remodelling<sup>31</sup>  
277 and immune-mediated mechanisms<sup>32</sup>.

278

279 A fundamental question in the biology of host-parasite interactions is whether the  
280 genetic makeup of parasites within an infection is determined by the genotype of the  
281 host. While there is some previous evidence of this in malaria, e.g. allelic variants of  
282 the *PfCSP* gene have been associated with HLA type<sup>33</sup> and HbS has itself previously

283 been associated with MSP-1 alleles<sup>34</sup>, the present findings provide the clearest  
284 evidence to date of an interaction between genetic variants in the parasite and the  
285 host. Our central discovery is that, among African children with severe malaria, there  
286 is a strong association between HbS in the host and three loci in different regions of  
287 the parasite genome. Based on estimation of relative risk, HbS has no apparent  
288 protective effect against severe malaria in the presence of the *Pfsa1+*, *Pfsa2+* and  
289 *Pfsa3+* alleles. These alleles, which are much more common in Africa than  
290 elsewhere, are positively correlated with HbS allele frequencies across populations.  
291 However, they are found in substantial numbers of individuals without HbS as well,  
292 reaching up to 60% allele frequency in some populations. The *Pfsa1*, *Pfsa2* and  
293 *Pfsa3* loci also show remarkably high levels of long-range between-locus linkage  
294 disequilibrium relative to other loci in the *P. falciparum* genome, which is equally  
295 difficult to explain without postulating ongoing evolutionary selection. While it  
296 seems clear that HbS plays a key role in this selective process, there is a need for  
297 further population surveys (including asymptomatic and uncomplicated cases of  
298 malaria) to gain a more detailed understanding of the genetic interaction between HbS  
299 and these parasite loci, and how this affects the overall protective effect of HbS  
300 against severe malaria.

301

## 302 **Methods**

### 303 **Ethics and consent**

304 Sample collection and design of our case-control study<sup>5</sup> was approved by Oxford University Tropical Research Ethics committee  
305 (OXTREC), Oxford, United Kingdom (OXTREC 020-006). Local approving bodies were the MRC/Gambia Government Ethics  
306 Committee (SCC 1029v2 and SCC670/630) and the KEMRI Research Ethics Committee (SCC1192).

307

### 308 **Building a combined dataset of human and *P.falciparum* genotypes in severe cases**

309 We used Illumina sequencing to generate two datasets jointly reflecting human and *P.falciparum* (*Pf*) genetic variation, using a  
310 sample of severe malaria cases from The Gambia and Kenya for which human genotypes have previously been reported<sup>2,5</sup>. A  
311 full description of our sequencing and data processing is given in **Supplementary Methods** and summarized in **Supplementary**  
312 **Figure 1**. In brief, following a process of sequence data quality control and merging across platforms, we generated i. a dataset  
313 of microarray and imputed human genotypes, and genome-wide *P.falciparum* genotypes, in 3,346 individuals previously  
314 identified as without close relationships<sup>5</sup>; and ii. a dataset of HbS genotypes directly typed on the Sequenom iPLEX Mass-Array  
315 platform (Agena Biosciences)<sup>2</sup>, and genome-wide *P.falciparum* genotypes, in 4,071 individuals without close relationships<sup>5</sup>.  
316 Parasite DNA was sequenced from whole DNA in samples with high parasitaemia, and using SWGA to amplify *Pf* DNA in all  
317 samples. *Pf* genotypes were called using an established pipeline<sup>17</sup> based on GATK, which calls single nucleotide polymorphisms  
318 and short insertion/deletion variants relative to the Pf3D7 reference sequence. This pipeline deals with mixed infections by  
319 calling parasite variants as if the samples were diploid; in practice this means that variants with substantial numbers of reads  
320 covering reference and alternate alleles are called as heterozygous genotypes.

321

322 For the analyses presented in main text, we used the 3,346 samples with imputed human genotypes for our initial discovery  
323 analysis, and the 4,071 individuals with directly-typed HbS genotypes for all other analysis. The individuals in these two datasets  
324 substantially overlap (**Supplementary Figure 1**), but a subset of 825 individuals have directly-typed for HbS but were not in the  
325 discovery data and we used these for replication.

326

### 327 **Inference of genetic interaction from severe malaria cases**

328 To describe our approach, we first consider a simplified model of infection in which parasites have a single definite (measurable)  
329 genotype, acquired at time of biting, that is relevant to disease outcome - i.e. we neglect any effects of within-host mutation, co-  
330 and super-infection at the relevant genetic variants. We consider the population of individuals who are susceptible to being been  
331 bitten by an infected mosquito, denoted  $A$ . A subset of infections go on to cause severe disease which we denote by  $D$ . Among  
332 individuals in  $A$  who are bitten and infected with a particular parasite type  $I = y$ , the association of a human allele  $E = e$  with  
333 disease outcome can be measured by the relative risk,

334

$$(1) \quad RR_{E=e;I=y} = \frac{P(D|E=e, I=y, A)}{P(D|E=0, I=y, A)}$$

335

336 where we have used  $E = 0$  to denote a chosen baseline human genotype against which risks are measured. If the strength of  
337 association further varies between parasite types then these relative risks will vary, such that the ratio of relative risks will differ  
338 from 1:

339

$$(2) \quad RRR_{E=e;I=y} = \frac{RR_{E=e;I=y}}{RR_{E=e;I=0}} \neq 1$$

340

341 where we have used  $I = 0$  to denote a chosen baseline parasite genotype. If the host genotype  $e$  confers protection against severe  
342 malaria, the ratio of relative risks will therefore capture variation in the level of protection compared between different parasite  
343 types.

344

345 Although expressed above in terms of a relative risk for human genotypes, rearrangement of terms in formula (2) can be  
346 equivalently expressed as a ratio of relative risks for a given parasite genotype compared between two human genotypes,

347

$$(3) \quad RRR_{E=e;I=y} = \frac{RR_{I=y;E=e}}{RR_{I=y;E=0}}$$

348

349 where  $RR_{I=y;E=e}$  is defined by analogy with (1). The ratio of relative risks is thus conceptually symmetric with respect to human  
350 and parasite alleles, and would equally well capture variation in the level of pathogenicity conferred by a particular parasite type  
351 compared between different human genotypes.

352

353 The odds ratio for specific human and parasite alleles computed in severe malaria cases is formally similar to the ratio of relative  
354 risks (2) but with the roles of the genotypes and  $D$  interchanged. Applying Bayes' theorem to each term shows that in fact

355

$$(4) \quad OR_{E=e;I=y} = RRR_{E=e;I=y} \times OR^{biting}$$

356

357 where  $OR^{biting}$  is a term that reflects possible non-independence of human and parasite genotypes at the time of mosquito biting  
358 (**Supplementary Methods**). Thus, under this model,  $OR_{E=e;I=y} \neq 1$  implies either that host and parasite genotypes are not  
359 independent at time of biting, or that there is an interaction (on the risk scale; **Supplementary Methods**) between host and  
360 parasite genotypes in determining disease risk. The former possibility may be considered less plausible because it would seem to  
361 imply that relevant host and parasite genotypes can be detected by mosquitos prior to or during biting, but we stress that this  
362 cannot be tested formally without data on mosquito-borne parasites. A further discussion of these assumptions can be found in  
363 **Supplementary Methods**.

364

### 365 **Testing for genome-to-genome correlation**

366 We developed a C++ program (HPTEST) to efficiently estimate the odds ratio (4) across multiple human and parasite variants.  
367 This program implements a logistic regression model in which genotypes from one file are included as the outcome variable and  
368 genotypes from a second file on the same samples are included as predictors. Measured covariates may also be included, and the  
369 model accounts for uncertainty in imputed predictor genotypes using the approach from SNPTEST<sup>35</sup>. The model is fit using a  
370 modified Newton-Raphson with line search method. For our main analysis we applied HPTEST with the parasite genotype as  
371 outcome and the host genotype as predictor, assuming an additive effect of the host genotype on the log-odds scale, and treating  
372 parasite genotype as a binary outcome (after excluding mixed and missing genotype calls.)  
373

374 To mitigate effects of finite sample bias, we implemented regression regularised by a weakly informative log-F(2,2) prior  
375 distribution<sup>36</sup> on the effect of the host allele (similar to a Gaussian distribution with standard deviation 1.87; **Supplementary**  
376 **Methods**). Covariate effects were assigned a log-F (0.08,0.08) prior, which has similar 95% coverage interval to a gaussian with  
377 zero mean and standard deviation of 40. We summarised the strength of evidence using a Bayes factor against the null model  
378 that the effect of the host allele is zero. A P-value can also be computed under an asymptotic approximation by comparing the  
379 maximum posterior estimate of effect size to its expected distribution under the null model (**Supplementary Methods**). For  
380 our main results we included only one covariate, an indicator of the country from which the case was ascertained (Gambia or  
381 Kenya); additional exploration of covariates is described below.  
382

### 383 **Choice of genetic variants for testing**

384 For our initial discovery analysis we concentrated on a set of 51,552 *Pf* variants that were observed in at least 25 individuals in  
385 our discovery set, after excluding any mixed or missing genotype calls. These comprised: 51,453 variants that were called as  
386 biallelic and passed quality filters (detailed in **Supplementary Methods**; including the requirement to lie in the core genome<sup>37</sup>);  
387 an additional 98 biallelic variants in the region of *PfEBL1* (which lies outside the core genome but otherwise appeared reliably  
388 callable); and an indicator of the *PfEBA175* 'F' segment, which we called based on sequence coverage as described in  
389 **Supplementary Methods and Supplementary Figure 11**. We included *PfEBL1* and *PfEBA175* variation because these genes  
390 encode known or putative receptors for *P.falciparum* during invasion of erythrocytes<sup>12</sup>.  
391

392 We concentrated on a set of human variants chosen as follows: we included the 94 autosomal variants from our previously  
393 reported list of variants with the most evidence for association with severe malaria<sup>5</sup>, which includes confirmed associations at  
394 *HBB*, *ABO*, *ATP2B4* and the glycoporphin locus. We also included three glycoporphin structural variants<sup>10</sup>, and 132 HLA alleles  
395 (62 at 2-digit and 70 at 4-digit resolution) that were imputed with reasonable accuracy (determined as having minor allele  
396 frequency > 5% and IMPUTE info at least 0.8 in at least one of the two populations in our dataset). We tested these variants  
397 against all 51,552 *P.falciparum* variants described above. We also included all common, well-imputed human variants within  
398 2kb of a gene determining a blood group antigen (defined as variants within 2kb of a gene in the HUGO Blood Group Antigen  
399 family<sup>38</sup> and having a minor allele frequency of 5% and an IMPUTE info score of at least 0.8 in at least one of the two  
400 populations in our dataset; this includes 39 autosomal genes and 4,613 variants in total). We tested these against all variants  
401 lying within 2kb of *P.falciparum* genes previously identified as associated or involved in erythrocyte invasion<sup>11,12</sup> (60 genes,  
402 1740 variants in total). In total we tested 19,830,288 distinct human-parasite variant pairs in the discovery dataset  
403 (**Supplementary Figure 4**).  
404

### 405 **Definition of regions of pairwise association**

406 We grouped all associated variant pairs (defined as pairs  $(v,w)$  having  $BF(v,w) > 100$ ) into regions using an iterative algorithm as  
407 follows. For each associated pair  $(v,w)$ , we found the smallest enclosing regions  $(R_v, R_w)$  such that any other associated pair  
408 either lay with  $(R_v, R_w)$  or lay further than 10kb from  $(R_v, R_w)$  in the host or parasite genomes, repeating until all associated pairs  
409 were assigned to regions. For each association region pair, we then recorded the region boundaries and the lead variants (defined  
410 as the regional variant pair with the highest Bayes factor), and we identified genes intersecting the region and the gene nearest to  
411 the lead variants using the NCBI refGene<sup>39</sup> and PlasmoDB v44<sup>40</sup> gene annotations. Due to our testing a selected list of variant  
412 pairs as described above, in some cases these regions contain a single human or parasite variant. **Supplementary Table 1**  
413 summarises these regions for variant pairs with  $BF > 1,000$ .  
414

#### 415 **Frequentist interpretation of association test results**

416 We compared association test P-values to the expectation under the null model of no association using a quantile-quantile plot,  
417 either before or after removing comparisons with HbS (**Supplementary Figure 3**; HbS is encoded by the 'A' allele at rs3334,  
418 chr11:5,248,232 T -> A). A simple way to interpret individual points on the QQ-plot is to compare each P-value to its expected  
419 distribution under the relevant order statistic (depicted by the grey area in **Supplementary Figure 3**); for the lowest P-value this  
420 is similar to considering a Bonferroni correction.

421

#### 422 **Bayesian interpretation of association test results**

423 For each human variant  $v$ , we summarised the evidence that  $v$  is associated with variation in the parasite genome using an  
424 average Bayes factor computed across all the variants tested against  $v$ :

425

$$(5) \quad BF_{avg}(v) = \frac{1}{N_i} \sum_w BF(v, w)$$

426

427 Here  $BF(v, w)$  is the Bayes factor computed by HPTEST for the comparison between  $v$  and  $w$ , and the sum is over variants  $w$  in  
428 the parasite genome that were tested against  $v$ . Under the restrictive assumption that at most one parasite variant is associated  
429 with  $w$ ,  $BF_{avg}(v)$  can be interpreted as a model-averaged Bayes factor reflecting the evidence for association; more generally  
430  $BF_{avg}$  provides a pragmatic way to combine evidence across all tested variants. We similarly define  $BF_{avg}(w)$  for each parasite  
431 variant  $w$  averaged over all human variants tested against  $v$ .  $BF_{avg}$  is plotted for human and parasite variants in **Supplementary**  
432 **Figure 4**.

433

434 A direct interpretation of these Bayes factors requires assuming relevant prior odds. We illustrate this using a possible  
435 computation as follows. The 51,552 *Pf* variants represent around 20,000 1kb regions of the *Pf* genome, which might be thought  
436 of as approximately independent given LD decay rates<sup>17</sup>. If we take the view that up to ten such regions might be associated  
437 with human genetic variants among those tested, this would dictate prior odds of around one in 2,000. With these odds, an  
438 average Bayes factor > 10,000 would be needed to indicate > 80% posterior odds of association. This calculation is illustrative;  
439 where specific information is available (for example, if a variant were known to affect a molecular interaction) this should be  
440 taken into account in the prior odds.

441

#### 442 **Investigation of additional associations**

443 In addition to the HbS-*Pf*sa associations, we also observed moderate evidence for association at a number of other variant pairs.  
444 These include associations between variation in the human gene *GCNT2* and *PfMSP4* with  $BF = 2.8 \times 10^6$ , and between HLA  
445 variation and multiple parasite variants with BF in the range  $10^5$ - $10^6$  (**Supplementary Figure 4** and **Supplementary Table 1**).  
446 A fuller description of the context of these SNPs can be found in **Supplementary Methods**. Our interpretation is that the  
447 statistical evidence for these associations is not sufficiently strong on its own to make these signals compelling without  
448 additional evidence.

449

#### 450 **Assessment of possible confounding factors**

451 To assess whether the observed association between HbS and *P.falciparum* alleles might be driven by confounding factors we  
452 conducted additional pairwise association tests as follows using HPTEST, based on directly-typed HbS genotypes and working  
453 separately in the two populations. Results are shown in **Supplementary Figure 7**. First, we repeated the pairwise association  
454 test including only individuals overlapping the discovery dataset, and separately in the remaining set of 825 individuals. For  
455 discovery samples a set of population-specific principal components (PCs) reflecting human population structure were previously  
456 computed<sup>5</sup> and we included these as covariates (including 20 PCs in total). Second, across all 4,071 individuals with directly-  
457 typed HbS data, we repeated tests including measured covariates as additional predictors. Specifically we considered: i. the age  
458 of individual at time of ascertainment (measured in years; range 0-12; treated as a categorical covariate), sex, reported ethnic  
459 group, and year of admission (range 1995-2010, treated as a categorical covariate); ii. technical covariates including an indicator  
460 of method of sequencing (SWGA or whole DNA), mean depth of coverage of the *Pf* genome, mean insert size computed from  
461 aligned reads, and percentage of mixed calls; and iii. an indicator of the clinical form of severe malaria which the sample  
462 was ascertained ('SM subtype'; either cerebral malaria, severe malarial anaemia, or other).

463

464 To assess the possibility that parasite population structure might impact results, we also included PCs computed in parasite  
465 populations as follows. Working in population separately, we started with the subset of biallelic SNPs with minor allele  
466 frequency at least 1% from among the 51,552 analysed variants (50,547 SNPs in Gambia and 48,821 SNPs in Kenya  
467 respectively). We thinned variants by iteratively picking variants at random from this list and excluding all others closer than  
468 1kb (leaving 12,036 SNPs in Gambia and 11,902 SNPs in Kenya). We used QCTOOL to compute PCs using this list of SNPs.  
469 Several of the top PCs had elevated loadings from SNPs in specific genomic regions. This was especially noticeable in Kenya  
470 and included the widely-reported extensive regions of LD around the *AATI* and *CRT* regions on chromosomes 6 and 7, and also  
471 the HbS-associated chromosome 2 and 11 loci. We therefore also considered separate sets of PCs computed after excluding  
472 SNPs in chromosomes 6 and 7 (leaving 9,933 and 9,812 SNPs respectively), after excluding chromosomes 2 and 11 (10,521 and  
473 10,421 SNPs respectively) or after excluding 100kb regions centred on the lead HbS-associated SNPs (11,866 and 11,732 SNPs  
474 respectively). For each set of PCs, we repeated association tests including 20 PCs as fixed covariates.

475

476 For each subset of individuals, each HbS-associated variant and each set of covariates described above, we plotted the estimated  
477 effect size and 95% posterior interval, annotated with the total number of samples, the number carrying the non-reference allele  
478 at the given variant, and the number carrying heterozygous or homozygous HbS genotypes (**Supplementary Figure 7**).  
479 Corresponding genotype counts can be found in **Supplementary Figure 6**. To assess mixed genotypes calls, we also plotted the  
480 ratio of reads with reference and nonreference alleles at each site; this can be found in **Supplementary Figure 8**.

481

#### 482 **Interpretation in terms of causal relationships**

483 Observing  $OR \neq 1$  implies nonindependence between host and parasite genotypes in individuals with severe disease, but does  
484 not determine the mechanism by which this could occur. Assuming  $OR^{\text{biting}} = 1$ , we show in **Supplementary Methods** that  
485  $OR = 1$  is equivalent to the following multiplicative model of host and parasite genotypes on disease risk ,

486

$$(6) \quad P(D|E = e, I = y) \propto \frac{P(D|I = y)}{P(D|I = 0)} \times \frac{P(D|E = e)}{P(E|E = 0)}$$

487

488 In general deviation from (6) could arise in several ways, including through within-host selection, interaction effects determining  
489 disease tolerance, as well as potential non-genotype-specific effects relating to disease diagnosis (similar to Berkson's paradox  
490 <sup>41</sup>). Our study provides only limited data to distinguish these possible mechanisms. For the HbS association described in main  
491 text, we note in **Supplementary Methods** that there is little evidence that the *Pfsa+* variants are themselves associated with  
492 increased disease risk, and little evidence that the *Pfsa+* variants associate with other host protective variants, suggesting that the  
493 observed interaction is specific to HbS.

494

#### 495 **Comparison of severe cases to human population controls**

496 Using  $D_y$  to denote severe disease caused by infection type  $y$ , the relative risk of the host genotype  $E = e$  on disease of type  $y$  can  
497 be written

498

$$(7) \quad RR_{E=e}(y) = \frac{P(D_y|E = e, A)}{P(D_y|E = 0, A)}$$

499

500 where  $E = 0$  represents the baseline host genotype as above. Under the simplified infection model considered above, comparison  
501 with formula (1) relates this to the relative risk for host and parasite genotypes considered above,

502

$$(8) \quad RR_{E=e}(y) = RR_{E=e, I=y} \cdot \frac{P(I = y|E = e, A)}{P(I = y|E = 0, A)}$$

503

504 As in (4), the second term captures possible variation in infection rates for parasite type  $y$  between human genotypes, while the  
505 first term captures possible within-host effects. Direct comparison with (4) shows

506

$$(9) \quad OR_{E=e,l=j} = \frac{RR_{E=e}(j)}{RR_{E=e}(0)}$$

507

508

We show in **Supplementary Methods** that  $RR_{E=e}(y)$  can be estimated using multinomial logistic regression comparing severe malaria cases to a sample of population controls, and we apply this approach in **Figure 2** to estimate  $RR_{E=e}(y)$ , where  $y$  ranges over combined genotypes at the three *Pfsa* loci.

509

510

511

512

#### **Assessing sequencing performance in HbS-associated regions**

513

We assessed sequencing performance at the chr2:631,190, chr2:814,288 and chr11:1,058,035 loci by computing counts of reads aligning to each position (“coverage”) and comparing this to the distribution of coverage across all biallelic sites in our dataset, treating each sample separately (**Supplementary Figure 11**). In general coverage at the three sites was high; we noted especially high coverage at chr2:814,288 in sWGA sequencing data (e.g. >90% of samples have coverage among the top 80% of that at biallelic variants genome-wide) but somewhat lower coverage in WGS samples at the chr11:1,058,035 locus. Variation in coverage between loci and samples is expected due to variation in DNA quantities, DNA amplification and sequencing processes, but we did not observe systematic differences in coverage between the different *Pfsa* genotypes at these loci. To further establish alignment accuracy, we also inspected alignment metrics and noted that across all analysis samples, over 99% of reads at each location carried either the reference or the identified non-reference allele, and over 99% of these reads had mapping quality at least 50 (representing confident read alignment). These results suggest sequencing reads provide generally accurate genotype calls at these sites.

514

515

516

517

518

519

520

521

522

523

524

525

#### **Assessing the distribution of between-chromosome LD**

526

We developed a C++ program (LDBIRD) to efficiently compute LD between all pairs of *Pf* variants. LDBIRD computes the frequency of each variant, and computes the correlation between genotypes at each pair of variants with sufficiently high frequency. It then generates a histogram of correlation values and reports pairs of variants with squared correlation above a specified level. We applied LDBIRD separately to *Pf* data from Gambian and Kenyan severe malaria cases. We restricted attention to comparisons between biallelic variants that had frequency at least 5% in the given population and with at least 75% of samples having non-missing genotypes at both variants in the pair, after treating mixed genotype calls as missing, and output all pairs with  $r^2$  at least 0.01 for further consideration. To avoid confounding of LD by the HbS association signal, we also repeated this analysis after excluding individuals that carry the HbS allele (with the latter results presented in **Figure 4 and Supplementary Table 2**).

527

528

529

530

531

532

533

534

535

536

To summarise between-chromosome LD results we grouped signals into regions as follows. First, we observed that most variant pairs have  $|r| < 0.15$  and hence  $r^2 > 0.05$  is typically a substantially outlying degree of inter-chromosomal LD (Figure 4). We therefore focussed on variant pairs  $(v_1, v_2)$  with  $r^2 > 0.05$ . To each such pair  $(v_1, v_2)$  we assigned a pair of LD regions  $(R_1, R_2)$  with the property that  $R_1$  and  $R_2$  capture all other nearby variants with high  $r^2$ . Specifically,  $R_1$  and  $R_2$  are defined as the smallest regions containing  $v_1$  and  $v_2$  respectively, such that for every other pair of variants  $(w_1, w_2)$  on the same chromosomes with  $r^2 > 0.05$ ,

537

538

539

540

541

542

$$(10) \quad \max_i \text{distance}(w_i, R_i) > 10kb$$

543

544

To compute  $R_1$  and  $R_2$ , we implemented an iterative algorithm that successively expands the initial pair until no additional nearby pairs with high  $r^2$  can be found.

545

546

547

For each LD region pair we recorded the region boundaries and the most-correlated pair of variants. For Table 1 we list the region pairs with  $r^2 > 0.25$ , reporting the superset of the region boundaries defined in the Gambian and Kenyan data where applicable. A full list of region pairs with  $r^2 > 0.05$  is given in **Supplementary Table 3**.

548

549

550

551

#### **Assessing the structure of *Pfsa* regions in available genome assemblies**

552

We extracted 101bp and 1001bp flanking sequence centred at the chr2:631,190, chr2:814,288 and chr11:1,058,035 loci from the Pf3D7 reference sequence. We then used minimap2<sup>42</sup> to align these sequences to a previously generated set of genome

553



554 assemblies from *P.falciparum* isolates and laboratory strains<sup>27</sup> (**Supplementary Table 4**), allowing for multiple possible  
555 mapping locations. Each flanking sequence aligned to a single location on the corresponding chromosome in all included  
556 genomes, with the exception that sequence flanking the chromosome 11 locus aligned to two locations in the ML01 sample.  
557 This sample was excluded from previous analysis<sup>27</sup> as it represents a multiple infection; we comment further on this below.

558  
559 To further inspect sequence identity, we used MAFFT to generate a multiple sequence alignment (MSA) corresponding to the  
560 1001bp sequence centred at each locus. Four isolates (GA01 from The Gabon, SN01 from Senegal, Congo CD01 and ML01  
561 from Mali) carry the non-reference 'A' allele at the chr11:1,058,035 SNP; two of these (GA01 and CD01) also carry the non-  
562 reference allele at the chr2:631,190 SNP and one (CD01) carries the non-reference allele at all three SNPs. However, expansion  
563 of alignments to include a 10,001bp segment indicated that these four samples also carry a structural rearrangement at the chr11  
564 locus. Specifically, GA01, SN01, CD01 and ML01 genomes include a ~1kb insertion present approximately 900bp to the right  
565 of chr11:1,058,035, and also a ~400bp deletion approximately 2400bp to the left of chr11:1,058,035. To investigate this, we  
566 generated kmer sharing 'dot' plots for k=50 across the region (**Supplementary Figure 10**), revealing a complex rearrangement  
567 carrying both deleted and duplicated segments. The duplicated sequence includes a segment (approx. coordinates 1,054,000-  
568 1,055,000 in Pf3D7) that contains the gene *SNRPF* ('small nuclear ribonucleoprotein F, putative') in the Pf3D7 reference.  
569 Inspection of breakpoints did not reveal any other predicted gene copy number changes in this region, including for  
570 *Pf3D7\_1127000*.

571  
572 As noted above, the chromosome 11 region aligns to a second contig in ML01 (contig chr0\_142, **Supplementary Table 4**). This  
573 contig appears to have a different tandem duplication of a ~4kb segment lying to the right of the associated SNP (approximately  
574 corresponding to the range 11:1,060,100 – 1,064,000 in Pf3D7; Supplementary Figure 8). This segment contains a number of  
575 genes including dUTPase, which has been under investigation as a potential drug target<sup>43</sup>. We interpret this second contig as  
576 arising due to the multiple infection in this sample<sup>27</sup>, and given challenges inherent in genome assembly of mixed samples it is  
577 unclear whether this duplication represents an assembly artefact or a second genuine regional structural variant.

578

#### 579 **Data Availability**

580 A full list of data generated by this study and relevant accessions can be found at <http://www.malariagen.net/resource/32>.

581

#### 582 **Code Availability**

583 Source code for HPTTEST and LDBIRD is available at <https://code.enkre.net/qctool> under an open-source license.

584

#### 585 **Author information**

586 **Author contributions:** Conceptualization: G.B., E.M.L., T.N.W., K.A.R., D.P.K.; Data Curation: G.B., E.M.L., T.N., M.J.,  
587 C.M.N., R.D.P., R.A., K.A.R.; Formal Analysis: G.B., E.M.L., K.A.R.; Funding Acquisition: D.P.K.; Investigation: C.H., A.E.J.,  
588 K.R., E.D., K.A.R.; Methodology: G.B., K.A.R., D.P.K.; Project Administration: S.M.G., E.D., K.A.R., D.P.K.; Resources:  
589 S.M.G., E.D., J.S., C.V.A., R.A., R.D.P., M.J., F.S-J., K.A.B., G.S., C.M.N., A.W.M., N.P., C.H., A.E.J., K.R., E.D., K.A.R.;  
590 Software and visualisation: G.B.; Supervision: D.J.C., U.d'A., K.M., T.N.W., S.M.G., K.A.R., D.P.K.; Writing: G.B., E.M.L.,  
591 T.N.W., K.A.R., D.P.K. in collaboration with all authors.

592

#### 593 **Acknowledgements**

594 We thank the patients and staff of Kilifi County Hospital and the KEMRI-Wellcome Trust Research Programme, Kilifi for their  
595 help with this study, and members of the Human Genetics Group in Kilifi for help with sample collection and processing. We  
596 thank the patients and staff at the Paediatric Department of the Royal Victoria Hospital in Banjul, Gambia for their help with the  
597 study. The human genetic data used in this study has previously been reported by the Malaria Genomic Epidemiology Network,  
598 and we thank all our colleagues who contributed to this previous work as part of MalariaGEN Consortium Project 1. A full list of  
599 consortium members is provided at <https://www.malariagen.net/projects/consortial-project-1/malariagen-consortium-members>.  
600 The MalariaGEN Pf6 open resource<sup>17</sup> was generated through the Malaria Genomic Epidemiology Network *Plasmodium*  
601 *falciparum* Community Project (<https://www.malariagen.net/resource/26>).

602

603 The Malaria Genomic Epidemiology Network study of severe malaria was supported by Wellcome (<https://wellcome.ac.uk/>)  
604 (WT077383/Z/05/Z [MalariaGEN]) and the Bill & Melinda Gates Foundation (<https://www.gatesfoundation.org/>) through the  
605 Foundations of the National Institutes of Health (<https://fnih.org/>) (566 [MalariaGEN]) as part of the Grand Challenges in Global  
606 Health Initiative. The Resource Centre for Genomic Epidemiology of Malaria is supported by Wellcome (090770/Z/09/Z;

607 204911/Z/16/Z [MalariaGEN]. This research was supported by the Medical Research Council (<https://mrc.ukri.org/>)  
608 (G0600718; G0600230; MR/M006212/1 [MalariaGEN]). Wellcome also provides core awards to the Wellcome Centre for  
609 Human Genetics (203141/Z/16/Z [WCHG]) and the Wellcome Sanger Institute (206194 [WSI]). Genome sequencing was  
610 carried out at the Wellcome Sanger Institute and we thank the staff of the Wellcome Sanger Institute Sample Logistics,  
611 Sequencing, and Informatics facilities for their contribution. TNW is supported through a Senior Fellowship from Wellcome  
612 (202800/Z/16/Z). This paper is published with permission from the Director of the Kenya Medical Research Institute (KEMRI).  
613 This research was funded in whole or in part by Wellcome as detailed above. For the purpose of Open Access, the author has  
614 applied a CC-BY public copyright licence to any author accepted manuscript version arising from this submission. The funders  
615 had no role in study design, data collection and analysis, decision to publish, or preparation of the manuscript.  
616

617 **References**

618

- 619 1 Kariuki, S. N. & Williams, T. N. Human genetics and malaria resistance.  
620 *Human Genetics* **139**, 801-811, doi:10.1007/s00439-020-02142-6 (2020).
- 621 2 Malaria Genomic Epidemiology Network. Reappraisal of known malaria  
622 resistance loci in a large multicenter study. *Nat Genet* **46**, 1197-1204,  
623 doi:10.1038/ng.3107 (2014).
- 624 3 Cowell, A. N. & Winzeler, E. A. The genomic architecture of antimalarial  
625 drug resistance. *Brief Funct Genomics* **18**, 314-328, doi:10.1093/bfgp/elz008  
626 (2019).
- 627 4 Gomes, P. S., Bhardwaj, J., Rivera-Correa, J., Freire-De-Lima, C. G. &  
628 Morrot, A. Immune Escape Strategies of Malaria Parasites. *Front Microbiol* **7**,  
629 1617, doi:10.3389/fmicb.2016.01617 (2016).
- 630 5 Band, G. *et al.* Insights into malaria susceptibility using genome-wide data on  
631 17,000 individuals from Africa, Asia and Oceania. *Nature Communications*  
632 **10**, 5732, doi:10.1038/s41467-019-13480-z (2019).
- 633 6 Band, G. *et al.* A novel locus of resistance to severe malaria in a region of  
634 ancient balancing selection. *Nature* **526**, 253-257, doi:10.1038/nature15390  
635 (2015).
- 636 7 Oyola, S. O. *et al.* Whole genome sequencing of Plasmodium falciparum from  
637 dried blood spots using selective whole genome amplification. *Malaria*  
638 *Journal* **15**, 597, doi:10.1186/s12936-016-1641-7 (2016).
- 639 8 Ahouidi, A. *et al.* An open dataset of Plasmodium falciparum genome  
640 variation in 7,000 worldwide samples [version 1; peer review: awaiting peer  
641 review]. *Wellcome Open Research* **6**, doi:10.12688/wellcomeopenres.16168.1  
642 (2021).
- 643 9 Timmann, C. *et al.* Genome-wide association study indicates two novel  
644 resistance loci for severe malaria. *Nature* **489**, 443-446,  
645 doi:10.1038/nature11334 (2012).
- 646 10 Leffler, E. M. *et al.* Resistance to malaria through structural variation of red  
647 blood cell invasion receptors. *Science* **356**, doi:10.1126/science.aam6393  
648 (2017).
- 649 11 Cowman, A. F., Berry, D. & Baum, J. The cellular and molecular basis for  
650 malaria parasite invasion of the human red blood cell. *J Cell Biol* **198**, 961-  
651 971, doi:10.1083/jcb.201206112 (2012).
- 652 12 Cowman, A. F., Tonkin, C. J., Tham, W. H. & Duraisingh, M. T. The  
653 Molecular Basis of Erythrocyte Invasion by Malaria Parasites. *Cell Host*  
654 *Microbe* **22**, 232-245, doi:10.1016/j.chom.2017.07.003 (2017).
- 655 13 Stan Development Team. Stan Modeling Language Users Guide and  
656 Reference Manual. doi:<https://mc-stan.org> (2021).
- 657 14 Piel, F. B. *et al.* Global epidemiology of sickle haemoglobin in neonates: a  
658 contemporary geostatistical model-based map and population estimates.  
659 *Lancet* **381**, 142-151, doi:10.1016/S0140-6736(12)61229-X (2013).
- 660 15 Mzilahowa, T., McCall, P. J. & Hastings, I. M. "Sexual" population structure  
661 and genetics of the malaria agent P. falciparum. *PLoS One* **2**, e613-e613,  
662 doi:10.1371/journal.pone.0000613 (2007).
- 663 16 Manske, M. *et al.* Analysis of Plasmodium falciparum diversity in natural  
664 infections by deep sequencing. *Nature* **487**, 375-379, doi:10.1038/nature11174  
665 (2012).

- 666 17 Pearson, R. D., Amato, R. & Kwiatkowski, D. P. An open dataset of  
667 Plasmodium falciparum genome variation in 7,000 worldwide samples.  
668 *bioRxiv*, 824730, doi:10.1101/824730 (2019).
- 669 18 Tindall, S. M. *et al.* Heterologous Expression of a Novel Drug Transporter  
670 from the Malaria Parasite Alters Resistance to Quinoline Antimalarials. *Sci*  
671 *Rep* **8**, 2464, doi:10.1038/s41598-018-20816-0 (2018).
- 672 19 Wang, Z. *et al.* Genome-wide association analysis identifies genetic loci  
673 associated with resistance to multiple antimalarials in Plasmodium falciparum  
674 from China-Myanmar border. *Sci Rep* **6**, 33891, doi:10.1038/srep33891  
675 (2016).
- 676 20 Amambua-Ngwa, A. *et al.* Major subpopulations of Plasmodium falciparum in  
677 sub-Saharan Africa. *Science* **365**, 813-816, doi:10.1126/science.aav5427  
678 (2019).
- 679 21 Moser, K. A. *et al.* Describing the current status of Plasmodium falciparum  
680 population structure and drug resistance within mainland Tanzania using  
681 molecular inversion probes. *Molecular Ecology* **30**, 100-113,  
682 doi:<https://doi.org/10.1111/mec.15706> (2021).
- 683 22 Verity, R. *et al.* The impact of antimalarial resistance on the genetic structure  
684 of Plasmodium falciparum in the DRC. *Nature Communications* **11**, 2107,  
685 doi:10.1038/s41467-020-15779-8 (2020).
- 686 23 Chang, H.-H. *et al.* Genomic Sequencing of Plasmodium falciparum Malaria  
687 Parasites from Senegal Reveals the Demographic History of the Population.  
688 *Molecular Biology and Evolution* **29**, 3427-3439, doi:10.1093/molbev/mss161  
689 (2012).
- 690 24 Park, D. J. *et al.* Sequence-based association and selection scans identify drug  
691 resistance loci in the <em>Plasmodium falciparum</em> malaria  
692 parasite. *Proceedings of the National Academy of Sciences* **109**, 13052,  
693 doi:10.1073/pnas.1210585109 (2012).
- 694 25 Matesanz, F., Téllez, M. a.-d.-M. & Alcina, A. The Plasmodium falciparum  
695 fatty acyl-CoA synthetase family (PfACS) and differential stage-specific  
696 expression in infected erythrocytes. *Molecular and Biochemical Parasitology*  
697 **126**, 109-112, doi:[https://doi.org/10.1016/S0166-6851\(02\)00242-6](https://doi.org/10.1016/S0166-6851(02)00242-6) (2003).
- 698 26 Otto, T. D. *et al.* Genomes of all known members of a Plasmodium subgenus  
699 reveal paths to virulent human malaria. *Nature Microbiology* **3**, 687-697,  
700 doi:10.1038/s41564-018-0162-2 (2018).
- 701 27 Otto, T. D. *et al.* Long read assemblies of geographically dispersed  
702 Plasmodium falciparum isolates reveal highly structured subtelomeres.  
703 *Wellcome Open Res* **3**, 52, doi:10.12688/wellcomeopenres.14571.1 (2018).
- 704 28 Luzzatto, L. Sick cell anaemia and malaria. *Mediterr J Hematol Infect Dis* **4**,  
705 e2012065, doi:10.4084/MJHID.2012.065 (2012).
- 706 29 Archer, N. M. *et al.* Resistance to <em>Plasmodium falciparum</em> in  
707 sickle cell trait erythrocytes is driven by oxygen-dependent growth inhibition.  
708 *Proceedings of the National Academy of Sciences* **115**, 7350-7355,  
709 doi:10.1073/pnas.1804388115 (2018).
- 710 30 Cholera, R. *et al.* Impaired cytoadherence of Plasmodium falciparum-infected  
711 erythrocytes containing sickle hemoglobin. *Proc Natl Acad Sci U S A* **105**,  
712 991-996, doi:10.1073/pnas.0711401105 (2008).
- 713 31 Cyrklaff, M. *et al.* Hemoglobins S and C Interfere with Actin Remodeling in  
714 <em>Plasmodium falciparum</em>-Infected Erythrocytes. *Science* **334**,  
715 1283-1286, doi:10.1126/science.1213775 (2011).

- 716 32 Williams, T. N. *et al.* An immune basis for malaria protection by the sickle  
717 cell trait. *PLoS Med* **2**, e128, doi:10.1371/journal.pmed.0020128 (2005).
- 718 33 Gilbert, S. C. *et al.* Association of malaria parasite population structure, HLA,  
719 and immunological antagonism. *Science* **279**, 1173-1177,  
720 doi:10.1126/science.279.5354.1173 (1998).
- 721 34 Ntoumi, F. *et al.* Imbalanced distribution of Plasmodium falciparum MSP-1  
722 genotypes related to sickle-cell trait. *Mol Med* **3**, 581-592 (1997).
- 723 35 Wellcome Trust Case Control Consortium. Genome-wide association study of  
724 14,000 cases of seven common diseases and 3,000 shared controls. *Nature*  
725 **447**, 661-678, doi:10.1038/nature05911 (2007).
- 726 36 Greenland, S. & Mansournia, M. A. Penalization, bias reduction, and default  
727 priors in logistic and related categorical and survival regressions. *Statistics in*  
728 *Medicine* **34**, 3133-3143, doi:10.1002/sim.6537 (2015).
- 729 37 Miles, A. *et al.* Indels, structural variation, and recombination drive genomic  
730 diversity in Plasmodium falciparum. *Genome Res* **26**, 1288-1299,  
731 doi:10.1101/gr.203711.115 (2016).
- 732 38 Braschi, B. *et al.* Genenames.org: the HGNC and VGNC resources in 2019.  
733 *Nucleic Acids Res* **47**, D786-D792, doi:10.1093/nar/gky930 (2019).
- 734 39 O'Leary, N. A. *et al.* Reference sequence (RefSeq) database at NCBI: current  
735 status, taxonomic expansion, and functional annotation. *Nucleic Acids Res* **44**,  
736 D733-745, doi:10.1093/nar/gkv1189 (2016).
- 737 40 Aurrecoechea, C. *et al.* PlasmoDB: a functional genomic database for malaria  
738 parasites. *Nucleic Acids Res* **37**, D539-543, doi:10.1093/nar/gkn814 (2009).
- 739 41 Berkson, J. Limitations of the application of fourfold table analysis to hospital  
740 data. *Int J Epidemiol* **43**, 511-515, doi:10.1093/ije/dyu022 (2014).
- 741 42 Li, H. Minimap2: pairwise alignment for nucleotide sequences. *Bioinformatics*  
742 **34**, 3094-3100, doi:10.1093/bioinformatics/bty191 (2018).
- 743 43 Pérez-Moreno, G. *et al.* Validation of Plasmodium falciparum dUTPase as the  
744 target of 5' -tritylated deoxyuridine analogues with anti-malarial activity.  
745 *Malaria Journal* **18**, 392, doi:10.1186/s12936-019-3025-2 (2019).  
746
